# Supplementary material for: AAV capsid engineering identified two novel variants with improved in vivo tropism for cardiomyocytes
Source: PubMed Central journal article supplement (PMC9734024; doi:10.1016/j.ymthe.2022.07.003), 2022-07-09
Supplement: mmc1.pdf [file mmc1.pdf]

## **Supplemental Information**

**AAV capsid engineering identified two novel  
variants with improved *in vivo*  
tropism for cardiomyocytes**

**Laura Rode, Christian Bär, Sonja Groß, Axel Rossi, Nadja Meumann, Janika Viereck, Naisam Abbas, Ke Xiao, Isabelle Riedel, Anika Gietz, Karina Zimmer, Margarete Odenthal, Hildegard Büning, and Thomas Thum**

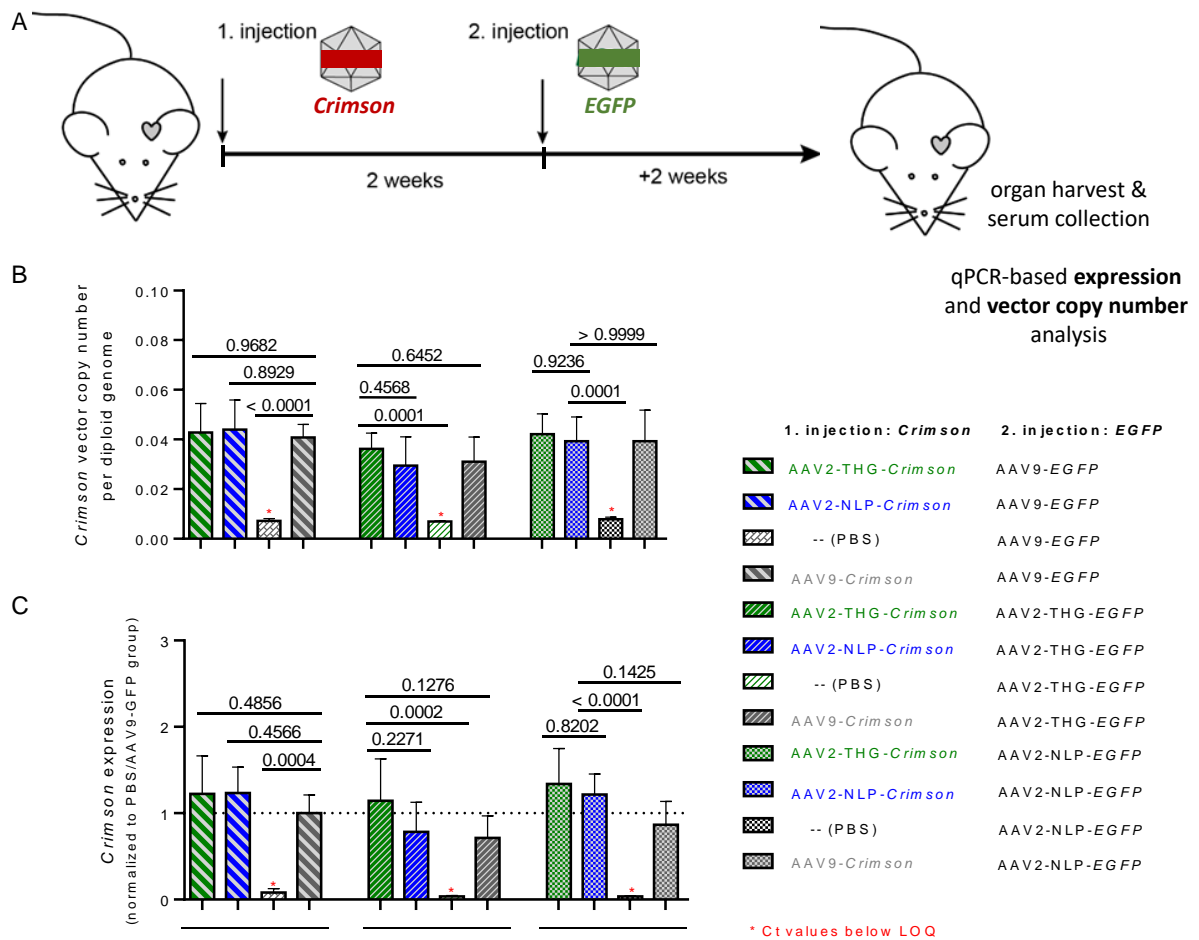

**Supplemental Fig. 1: *Crimson* vector copy number and expression analysis.**

(A) AAV vectors delivering *GFP* were injected two weeks after a previous AAV vector injection of different AAV variants delivering the *Crimson* transgene ( $4 \times 10^{10}$  vector genomes or PBS as control). (B+C) Overview of vector copy number analysis (B) and expression analysis (C) from the first injected AAV vector (*Crimson* transgene) showing comparable vector copy numbers and expression levels, respectively, in all groups receiving the *Crimson* transgene by AAV-mediated delivery.  $n=5$ , data are means  $\pm$  SD. P-values were determined by one-way ANOVA with Dunnett's multiple comparison to the group which received the same AAV capsid variant (AAV2-THG, AAV2-NLP, AAV9) in the first and second injection. (LOQ: limit of quantification)

**Supplemental Table 1:** Echocardiographic analysis of sham and TAC mice after therapeutic overexpression of lncRNA *H19* using AAV9, AAV2-THGTPAD and AAV2-NLPGSGD.

|                                         | sham         | TAC          |              |                 |                 |
|-----------------------------------------|--------------|--------------|--------------|-----------------|-----------------|
|                                         | AAV9-empty   | AAV9-empty   | AAV9-H19     | AAV2-THG-H19    | AAV2-NLP-H19    |
| LV ejection fraction (%)                | 59.2 ± 4.8   | 31.5 ± 9.7   | 35.6 ± 8     | 54.2 ± 5.6 ***  | 44.7 ± 11.1 *   |
| Fractional shortening (%)               | 31.2 ± 3.4   | 15.1 ± 5.1   | 17.2 ± 4     | 28.1 ± 3.5 ***  | 22.5 ± 6.4 *    |
| Cardiac output (µl/min)                 | 20.9 ± 5     | 18.5 ± 5.5   | 18.3 ± 7.4   | 24.7 ± 6.9      | 23.8 ± 7.4      |
| LV mass (mg)                            | 89.8 ± 18.8  | 199.6 ± 48.7 | 167.7 ± 44.1 | 130.4 ± 46.5 ** | 147.3 ± 52.4 ** |
| End-diastolic volume (µl)               | 77.6 ± 10.7  | 130.7 ± 38.8 | 117.9 ± 37.6 | 96.2 ± 26.7     | 112.6 ± 38.3    |
| End-systolic volume (µl)                | 31.6 ± 5.4   | 92.2 ± 38.2  | 78.1 ± 35.9  | 45.1 ± 17 **    | 64.9 ± 33.5     |
| Stroke volume (µl)                      | 46 ± 7.8     | 38.5 ± 8.3   | 39.8 ± 8.9   | 51.1 ± 10.4 **  | 47.7 ± 11.4     |
| End-diastolic diameter (mm)             | 4.2 ± 0.2    | 5.2 ± 0.7    | 4.9 ± 0.6    | 4.5 ± 0.5 *     | 4.8 ± 0.7       |
| End-systolic diameter (mm)              | 2.9 ± 0.2    | 4.4 ± 0.8    | 4.1 ± 0.7    | 3.3 ± 0.5 ***   | 3.8 ± 0.8       |
| End-diastolic anterior wall (mm)        | 0.6 ± 0.1    | 0.9 ± 0.1    | 0.9 ± 0.1    | 0.7 ± 0.1 **    | 0.8 ± 0.1 *     |
| End-systolic anterior wall (mm)         | 0.9 ± 0.1    | 1 ± 0.1      | 1 ± 0.1      | 1 ± 0.2         | 1 ± 0.2         |
| End-diastolic posterior wall (mm)       | 0.6 ± 0.1    | 0.8 ± 0.1    | 0.7 ± 0.1    | 0.7 ± 0.1       | 0.7 ± 0.1 *     |
| End-systolic posterior wall (mm)        | 0.8 ± 0.1    | 0.9 ± 0.1    | 0.9 ± 0.1    | 1 ± 0.1         | 0.9 ± 0.1       |
| End-diastolic IV septum (mm)            | 0.6 ± 0.1    | 0.9 ± 0.1    | 0.9 ± 0.2    | 0.8 ± 0.1 **    | 0.7 ± 0.1 **    |
| End-systolic IV septum (mm)             | 0.8 ± 0.1    | 1 ± 0.2      | 1 ± 0.1      | 1 ± 0.2         | 1 ± 0.1         |
| End-diastolic LV internal diameter (mm) | 4.2 ± 0.2    | 5.2 ± 0.7    | 5 ± 0.6      | 4.5 ± 0.6 *     | 4.8 ± 0.7       |
| End-systolic LV internal diameter (mm)  | 2.9 ± 0.2    | 4.4 ± 0.8    | 4.1 ± 0.7    | 3.3 ± 0.5 **    | 3.8 ± 0.8       |
| Heart rate (bpm)                        | 452.2 ± 59.8 | 479.2 ± 83.9 | 450 ± 93.5   | 479.5 ± 76.5    | 498.6 ± 82.4    |

Data are mean ± SD

\* $P < 0.05$ , \*\* $P < 0.01$ , \*\*\* $P < 0.001$  between *H19* overexpression with the respective AAV vector variant (AAV9 or AAV2-THGTPAD or AAV2-NLPGSGD) and TAC AAV9-empty; one-way ANOVA with Dunnett's multiple comparison to TAC AAV9-empty; IV – interventricular, LV – left ventricle
